# Supplementary material
Source: PubMed Central journal article supplement (PMC4116691)
Supplement: NIHMS604255-supplement-01.pdf [file NIHMS604255-supplement-01.pdf]

**SUPPLEMENTAL FIGURE LEGENDS**

**Figure S1. Generation of BATI4OE and Ucp1-Cre mice.** **A**, Schematic of the strategy used to generate BATI4OE mice. **B**, Schematic of the Ucp1-Cre BAC transgene. **C**, QPCR was performed using mRNA from different tissues of Ucp1-Cre X Rosa26-td tomato mice (n=5). **D**, Cre expression was measured by QPCR in different fat depots of mice exposed to cold for the indicated time (n=4). **E, F**, O<sub>2</sub> consumption and CO<sub>2</sub> production rates of male Ucp1-Cre and WT littermate mice were measured by indirect calorimetry using CLAMS after 16 weeks on HFD (n=8). Related to Fig. 2.

**Figure S2. Characteristics of BATI4OE mice on chow and high fat diet.** **A**, Body weight of BATI4OE mice on chow (n=9-16, \**p*<0.05). **B**, Body composition of the mice from **A** (\**p*<0.05). **C**, Weight of fat pads in high-fat fed control and BATI4OE mice. **D**, Locomotor activity of BATI4OE and WT littermates after 4 weeks on HFD (n=8). **E, F**, GTT and ITT of BATI4OE mice after 4-5 wks HFD (n= 8-10, \**p*<0.05). **G**, Oxidation of <sup>14</sup>C-palmitate in isolated mitochondria from BAT (n= 10-12). **H**, Western blot analysis of isolated BAT mitochondria from main Fig. 3E. **I**, Rate of lipolysis in isolated adipocytes from BAT of male control and BATI4OE (OE) mice (n = 5). **J**, Lipolysis in control and BATI4OE (OE) mice on chow diet. Glycerol in plasma was measured in the absence and presence of 10 mg/kg of isoproterenol (n = 5). **K**, Lipogenesis in isolated brown adipocytes from BATI4OE and control mice. Results are expressed as mean ± SEM (\**p* < 0.05; n = 5). Related to Fig. 2.

**Figure S3. Browning of white fat is affected in BATI4OE mice.** **A**, RNA was harvested from the inguinal WAT of BATI4OE or control littermates housed at 23°C or 4°C for 6 days. Gene expression was measured using QPCR. Data are normalized to *36B4* and expressed as mean ± SEM (n=3-5, \**p*<0.05). **B**, Immunohistochemical detection of UCP1 in inguinal WAT of mice shown in **A** (higher magnification is shown in insets). **C**, RNA was harvested from epididymal WAT of BATI4OE or control littermates housed at 23°C or 4°C for 6 days. Gene expression was measured using QPCR. Data are normalized to *36B4* and expressed as mean ± SEM (n=3-5, \**p*<0.05). **D**, Immunohistochemical detection of UCP1 in epididymal WAT of mice shown in **C** (higher magnification is shown in insets). Related to Fig. 3.

**Figure S4. Characteristics of BATI4KO mice on chow and HFD.** **A**, Body weight of BATI4KO mice on chow (n=9-16, \* $p < 0.05$ ). **B**, Body composition of the mice from **A** (\* $p < 0.05$ ). **C**, Weight of fat pads in high-fat fed control and BATI4KO mice. **D**, Locomotor activity of BATI4KO and control littermates after 22 weeks on HFD (n=8). **E**, Glucose tolerance test in 24-week-old BATI4KO mice on HFD after intraperitoneal injection of glucose (n=8-10, \* $p < 0.05$ ). **F**, Insulin tolerance test in 25-week-old BATI4KO mice on HFD after intraperitoneal injection of insulin (n= 8-10, \* $p < 0.05$ , \*\* $p < 0.01$ ). **G, H**, GTT and ITT of BATI4KO mice at 2 and 4 weeks after the initiation of HFD, before divergence of body weight. Related to Fig. 4.

**Figure S5. IRF4 affects brown adipose lipid handling and mitochondrial function.** **A**, Oxidation of  $^{14}\text{C}$ -palmitate in isolated mitochondria from BAT (n= 10-12). **B**, Rate of lipolysis in isolated adipocytes from BAT of male Flox and BATI4KO mice. Results are expressed as mean  $\pm$  SEM (\* $p < 0.05$ ; n = 5). **B**, Rate of lipolysis in isolated adipocytes isolated from BAT of male control and BATI4KO mice (n = 5). **C**, Lipolysis in control and BATI4KO mice on chow diet. Glycerol in plasma was measured in the absence and presence of 10 mg/kg of isoproterenol (n = 5). **D**, Lipogenesis in isolated adipocytes from BATI4KO and control mice. Results are expressed as mean  $\pm$  SEM (\* $p < 0.05$ ; n = 5). **E**, Western blot analysis of isolated BAT mitochondria from main Fig. 5G. **F**, Transmission electron microscopy of interscapular BAT in BATI4KO and control mice at 23°C. **G, H**, Mitochondrial size and cristae density in sections from mice shown in **F**, determined by counting >100 mitochondria from at least three sections/mouse and three mice/genotype. Related to Fig. 5.

**Figure S6. Browning of white fat is affected in BATI4KO mice.** **A, D**, RNA was harvested from inguinal WAT of BATI4KO or control littermates housed at 23°C or 4°C for 6 days. Gene expression was measured using QPCR. Data are normalized to *36B4* and expressed as mean  $\pm$  SEM (n=3-5, \* $p < 0.05$ ). **B**, Immunohistochemical detection of UCP1 of inguinal WAT of mice shown in **A** (higher magnification is shown in insets). **C**, RNA was harvested from epididymal WAT of BATI4KO or control littermates housed at 23°C or 4°C for 6 days. Gene expression was measured using QPCR. Data are normalized to *36B4* and expressed as mean  $\pm$  SEM (n=3-5, \* $p < 0.05$ ). **D**,

Immunohistochemical detection of UCP1 of epididymal WAT of mice shown in **C** (higher magnification is shown in insets). Related to Fig. 5.

**Figure S7. Genetic, physical, and functional interactions between IRF4 and PGC-1 $\alpha$  in brown fat.** **A**, *Irf4* mRNA expression in interscapular BAT from control vs. adipocyte-specific *Ppargc1a* null mice (Adipoq-cre x *Ppargc1a*<sup>fllox</sup>) (n=4, \**p*<0.05). **B**, SVF from BAT of control vs. adipocyte-specific *Ppargc1a* null mice was differentiated into adipocytes and then treated with Forskolin or vehicle for 4 hours. Gene expression was measured using QPCR. Data are normalized to *36B4* and expressed as mean  $\pm$  SEM (n=3-4, \**p*<0.05). **C**, Schematic representation of mouse PGC-1 $\alpha$ . Red lines indicate the location of the three LXXLL motifs. **D**, Co-IP of IRF4 with the N terminus of PGC-1 $\alpha$ , but not a C-terminal fragment. **E**, IRF4 does not interact with a mutant allele of PGC-1 $\alpha$  lacking the second and third LXXLL motifs of PGC-1 $\alpha$  (PGC-1 $\alpha$ -LALA). **F**, Schematic representation of mouse IRF4, showing the DNA binding domain (DBD) and protein interaction associated domain (IAD). **G**, Co-IP of PGC-1 $\alpha$  with the C-terminal fragment of IRF4, but not an N-terminal fragment. **H**, Fragments of the *Ucp1* promoter fused to a luciferase reporter gene were co-transfected into primary brown adipocytes together with pCDH-GFP (control) or IRF4 in the presence or absence of a PGC-1 $\alpha$  expression plasmid. Luciferase activity was corrected for Renilla luciferase activity and normalized to control activity (n=3, \**p*<0.05). Related to Fig. 7.

## SUPPLEMENTAL METHODS

### Generation of *Ucp1*-cre transgenic mice

A C57Bl/6 mouse bacterial artificial chromosome (148M1) containing the *Ucp1* gene was transformed into the recombinogenic EL250 bacteria cells, and homologous recombination was performed as described elsewhere (Lee et al., 2001). The Cre-FRT-Kan-FRT cassette was transformed into the *Ucp1* BAC host EL250 cells and recombined to insert the Cre ATG into the *Ucp1* ATG. *Ucp1*-Cre-FRT-Kan-FRT BAC host EL250 clones were identified by PCR screening. The FRT-Kan-FRT cassette was removed, and an *Ucp1*-Cre BAC host EL250 clone without mutation in the Cre coding sequence was obtained. The loxP site present in the vector sequence of the *Ucp1*-Cre BAC was removed. The transgenic construct was microinjected into pronuclei of fertilized one-cell stage embryos of FVB mice (Jackson Laboratories) via standard

methods. The Ucp1-Cre line was back-crossed more than eight times onto C57BL/6J prior to use in these experiments; these mice are maintained as hemizygotes. The Ucp1-Cre mice are now available through Jackson Labs (JAX Stock No. 024670; B6.129-Tg(Ucp1-Cre)1Evdr/J).

### **Generation of Rosa26-LSL-IRF4 transgenic mice**

The murine IRF4 cDNA was knocked into a locus immediately downstream of the endogenous Rosa26 gene promoter and a loxP-STOP-loxP sequence in the Ai9 plasmid (Madisen et al., 2010). The IRF4 cDNA was fused in frame to an N-terminus biotin ligase recognition peptide, and was designed to be expressed as a single peptide that includes the bacterial biotin ligase BirA, separated from IRF4 by an autocleavable viral 2A sequence. The construct was linearized with KpnI and microinjected into 129/Sv embryonic stem cells. Successful integration of a single copy of the transgene was validated using Southern blotting and long-range PCR (5' primers: 5'-GCCAAGTGGGCAGTTTACCG-3' and 5'-TAGGTAGGGGATCGGGACTCT-3'; 3' primers: 5'-GCCAGCTCATTCTCCCACTC-3' and 5'-GGCATGGCAATGTTCAAGCAG-3'). Intact microinjected eggs were transferred into pseudopregnant recipients by the BIDMC transgenic core.

### **Generation of BATI4KO and BATI4OE Mice**

*Irf4<sup>fllox/fllox</sup>* mice (Klein et al., 2006) were first crossed to Ucp1-Cre mice, and BATI4KO cohorts were established by mating F1 *Irf4<sup>fllox/+</sup>;Cre<sup>+</sup>* mice to littermate *Irf4<sup>fllox/+</sup>;Cre<sup>-</sup>* mice. The BATI4OE cohorts were established by directly mating the Rosa26-LSL-IRF4 mice to Ucp1-Cre mice. Mice were maintained under a 12 hr light/12 hr dark cycle at constant temperature (23°C) with free access to food and water and were fed either a standard chow diet (8664, Harlan Teklad) or a high-fat diet (D12331; Research Diets Inc.). Body weight was measured weekly. Mice were subjected to magnetic resonance imaging (MRI) (Echo Medical Systems) to examine body composition.

### **Primary preadipocytes and adipocytes**

The interscapular brown fat pad (total of 6-8 fat pads) was dissected from newborn mice (postnatal day 2-4), minced, and then digested for 45 min at 37°C in isolation buffer [123mM NaCl, 5mM KCl, 1.3mM CaCl<sub>2</sub>, 5mM glucose, 100mM Hepes, 4% BSA, 1.5mg/ml Collagenase B (Roche)]. Digested tissue was filtered through a 100 um cell strainer to remove large pieces, and the flow-through was then centrifuged for 10 minutes at 600xg to pellet the stromal-vascular fraction (SVF) cells. SVF cells were resuspended in complete culture medium (DMEM/F12 (1:1; Invitrogen) plus Glutamax,

Pen/Strep, and 10% FBS (Gemini Bio-products), and then plated onto 10cm tissue culture dishes. For preadipocyte differentiation, cells grown to 100% confluence (Day 0) were exposed to induction DMEM/F12 GlutaMAX™ containing dexamethasone (5 $\mu$ M; Sigma), insulin (0.5 $\mu$ g/ml; Sigma), isobutylmethylxanthine (0.5mM; Sigma), rosiglitazone (1 $\mu$ M; Cayman), T3 (1nM; Sigma) and 10% FBS. Four days after induction (from Day 4), cells were maintained in media containing insulin (0.5 $\mu$ g/ml), T3 (1nM) and 10% FBS until ready for harvest (generally day 6-7 post-differentiation).

### **Lipolysis assay**

For *ex vivo* studies, adipocytes were isolated from brown fat pads by collagenase digestion. Cells were resuspended in Krebs-Ringer HEPES (KRH) buffer at  $2 \times 10^5$  cells/ml. Cells were incubated in the presence or absence of 1 mM isoproterenol for 0–2 hr at 37°C with gentle shaking. Glycerol content of conditioned medium was determined with the Free Glycerol Determination Kit (Sigma). For *in vivo* studies, mice were fasted for 4hr and injected with isoproterenol (10mg/kg body weight). Blood was collected from the tail vein before and 15 min after injection, and glycerol content of serum was measured as above.

### **Lipogenesis assay**

For *ex vivo* studies, adipocytes were isolated from brown fat pads as in the lipolysis assay. Cells were incubated in the presence of 100nM insulin for 15 min and incubated with 1 $\mu$ Ci  $^{14}$ C-glucose per well for 1hr at 37°C. Cells were then washed three times with ice-cold PBS. Radiolabeled glucose incorporation into lipid was assessed by placing cells into 0.5ml PBS and shaking vigorously with 3 ml Betaflour Liquid Scintillation Fluid (National Diagnostics). After samples settled overnight, radioactivity partitioning into the organic phase was determined by scintillation counting.

### **Fatty acid oxidation assay**

BAT mitochondria were extracted as mentioned above. 350  $\mu$ g mitochondria were incubated for 1 hr with reaction buffer (100mM sucrose, 5mM  $\text{KH}_2\text{PO}_4$ , 10mM Tris-HCl, 0.2 mM EDTA, 0.2% fatty acid-free BSA, 50mM KCl, 1mM  $\text{MgCl}_2$ , 2mM L-carnitine, 0.1mM malate, 0.05mM coenzyme A, 1mM DTT, 2mM ATP and 0.1mM palmitic acid) supplemented with [1- $^{14}$ C] palmitic acid. The oxidation reaction was terminated and  $\text{CO}_2$  was released from the media by the addition of 6N HCl. Filter paper saturated with NaOH was placed in the tube cap to capture  $\text{CO}_2$ . Following 2hr incubation,  $^{14}\text{CO}_2$  resulting from oxidized fatty acid was quantified by scintillation counting of the filter paper. The results were normalized to total protein.
