# Supplementary material
Source: PubMed Central journal article supplement (PMC4116691)

# Supplemental Figure 1

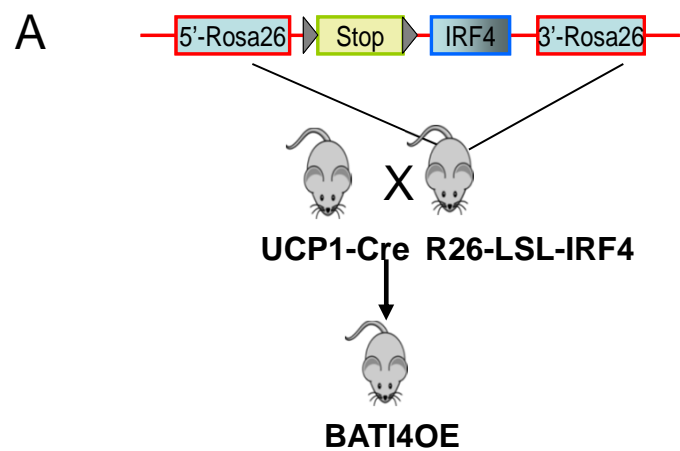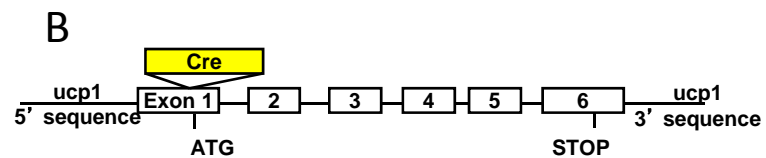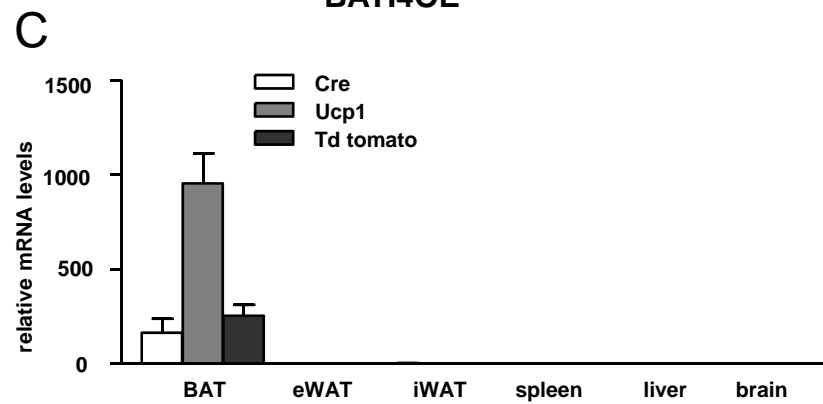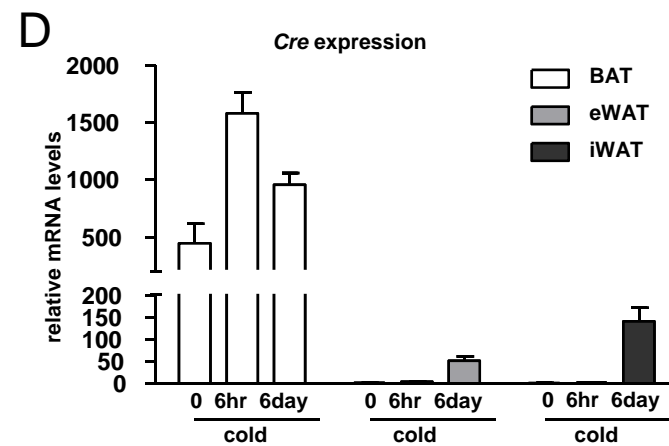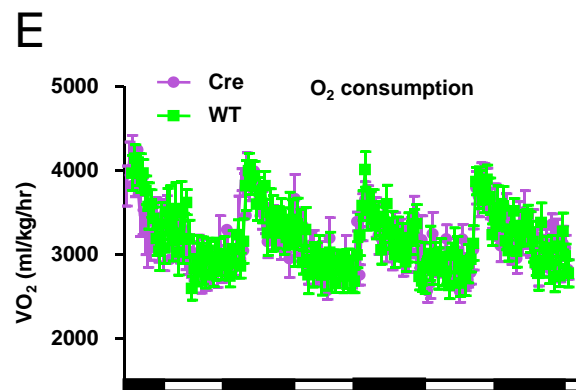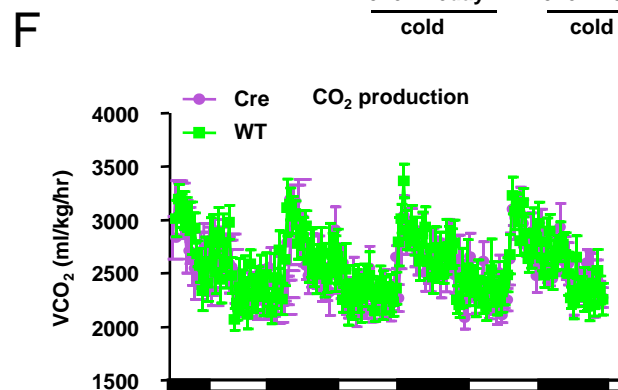

■ dark □ light

## Supplemental Figure 2

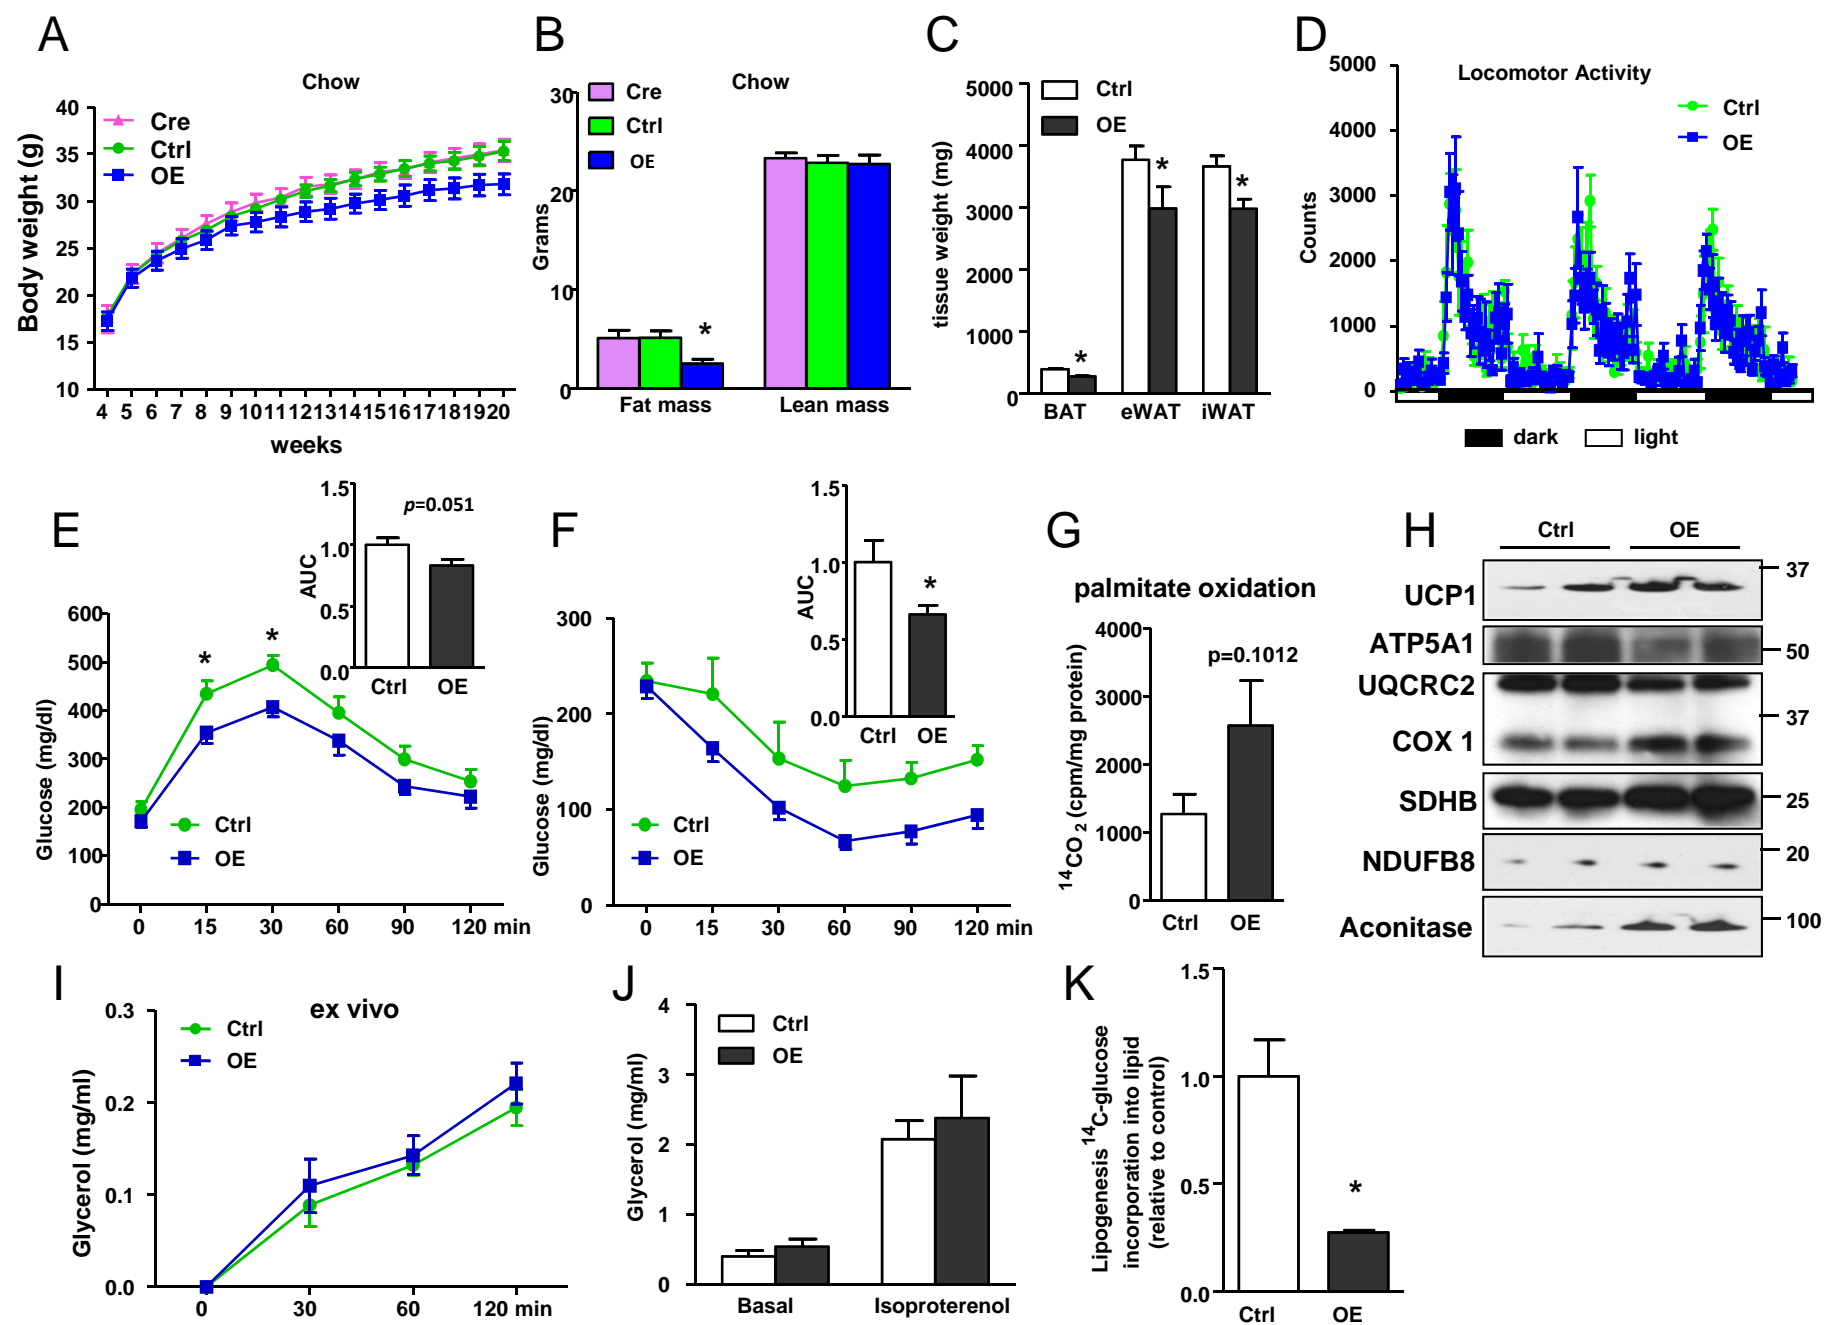

# Supplemental Figure 3

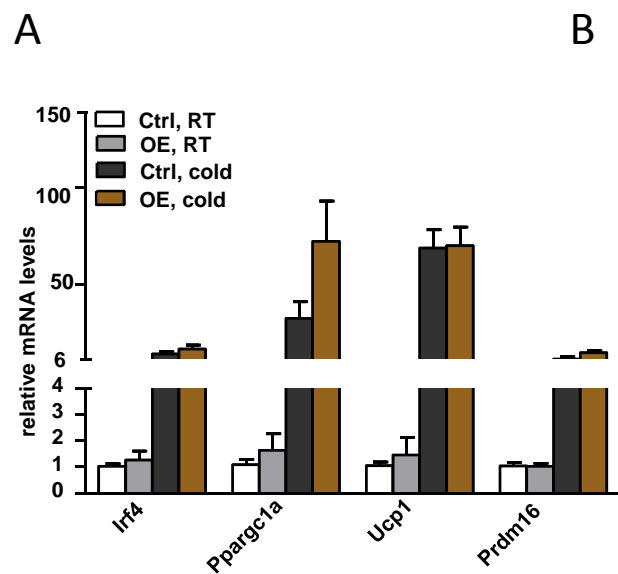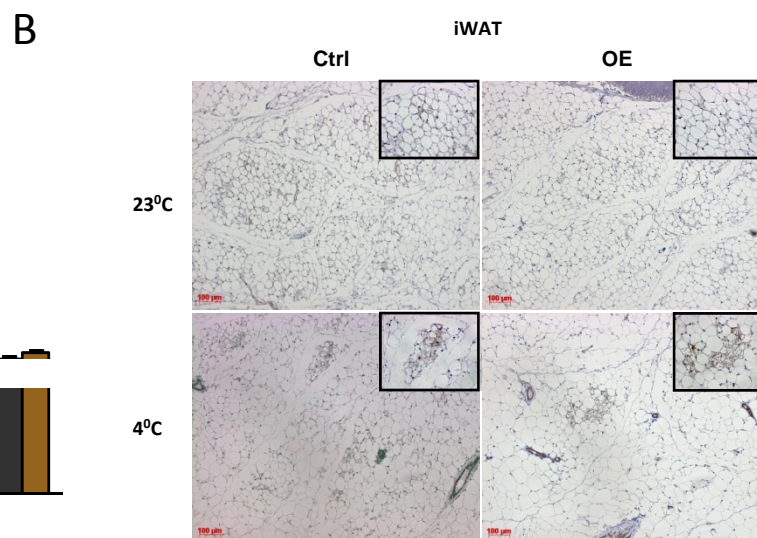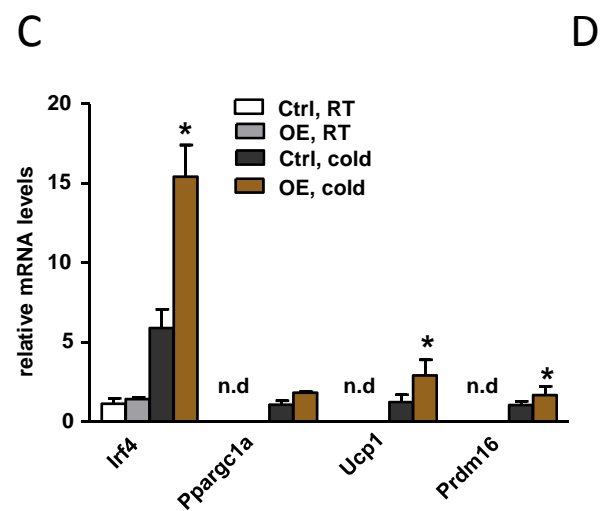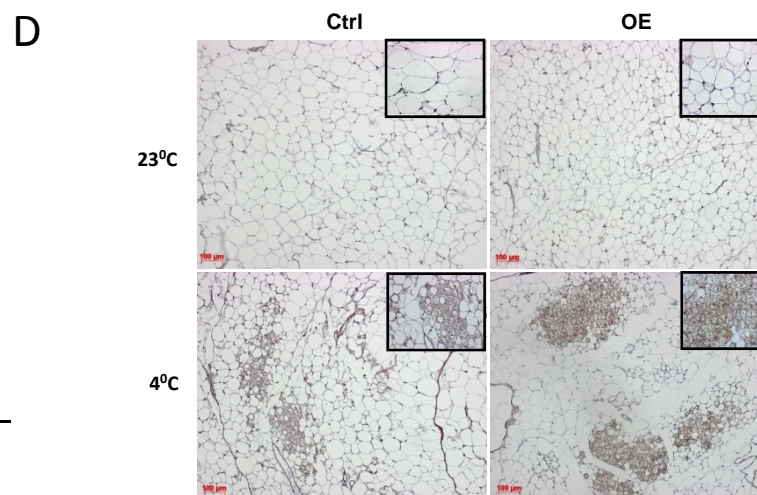

## Supplemental Figure 4

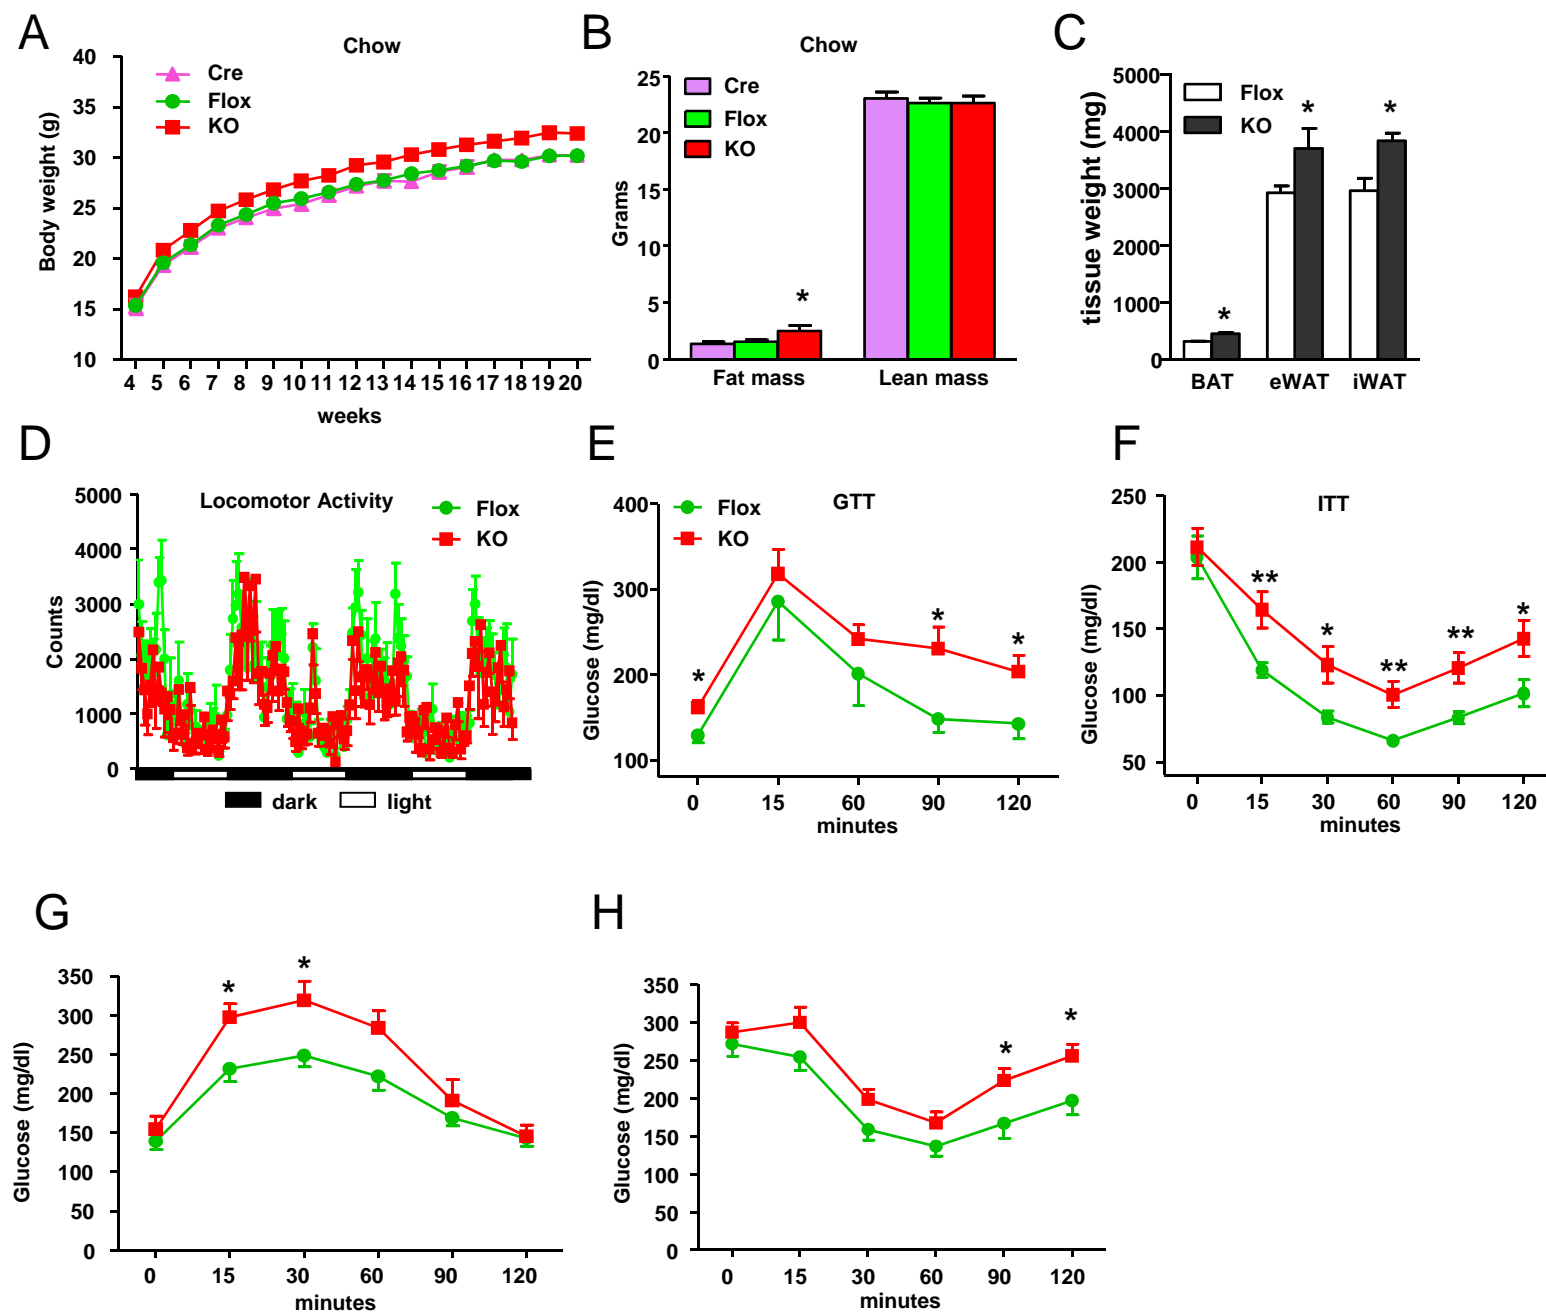

## Supplemental Figure 5

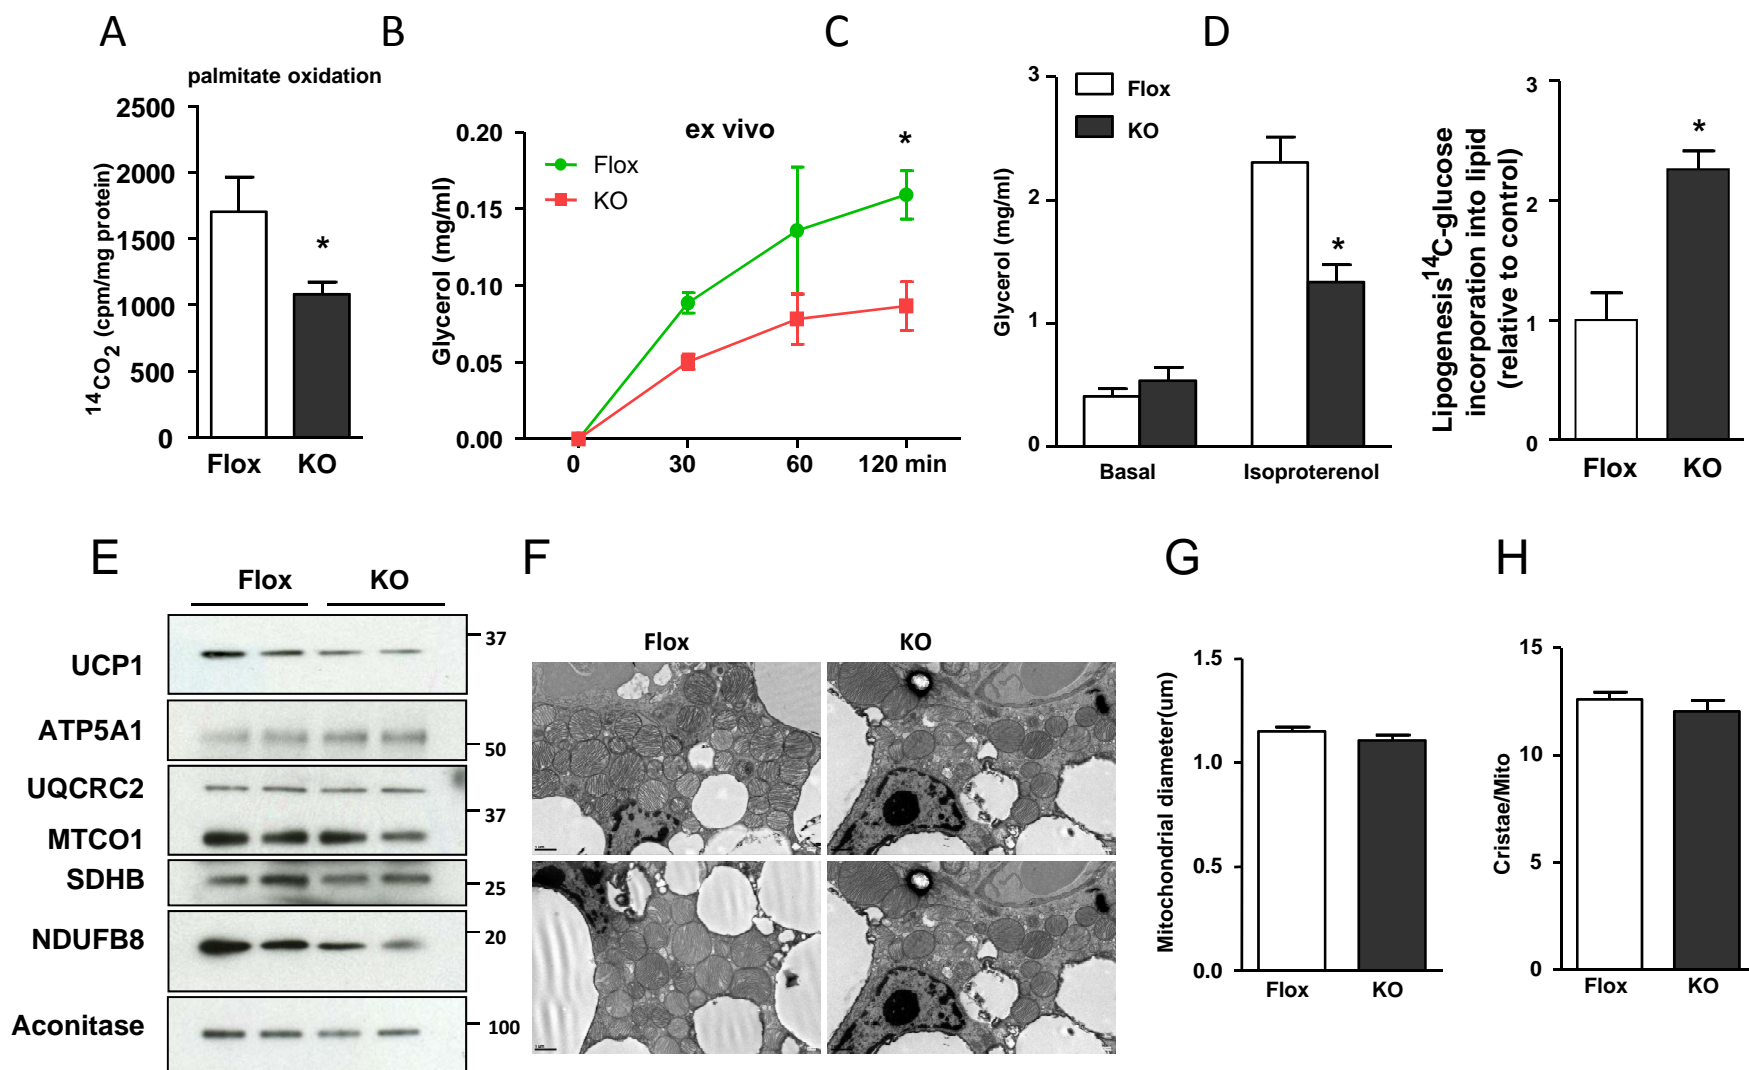

## Supplemental Figure 6

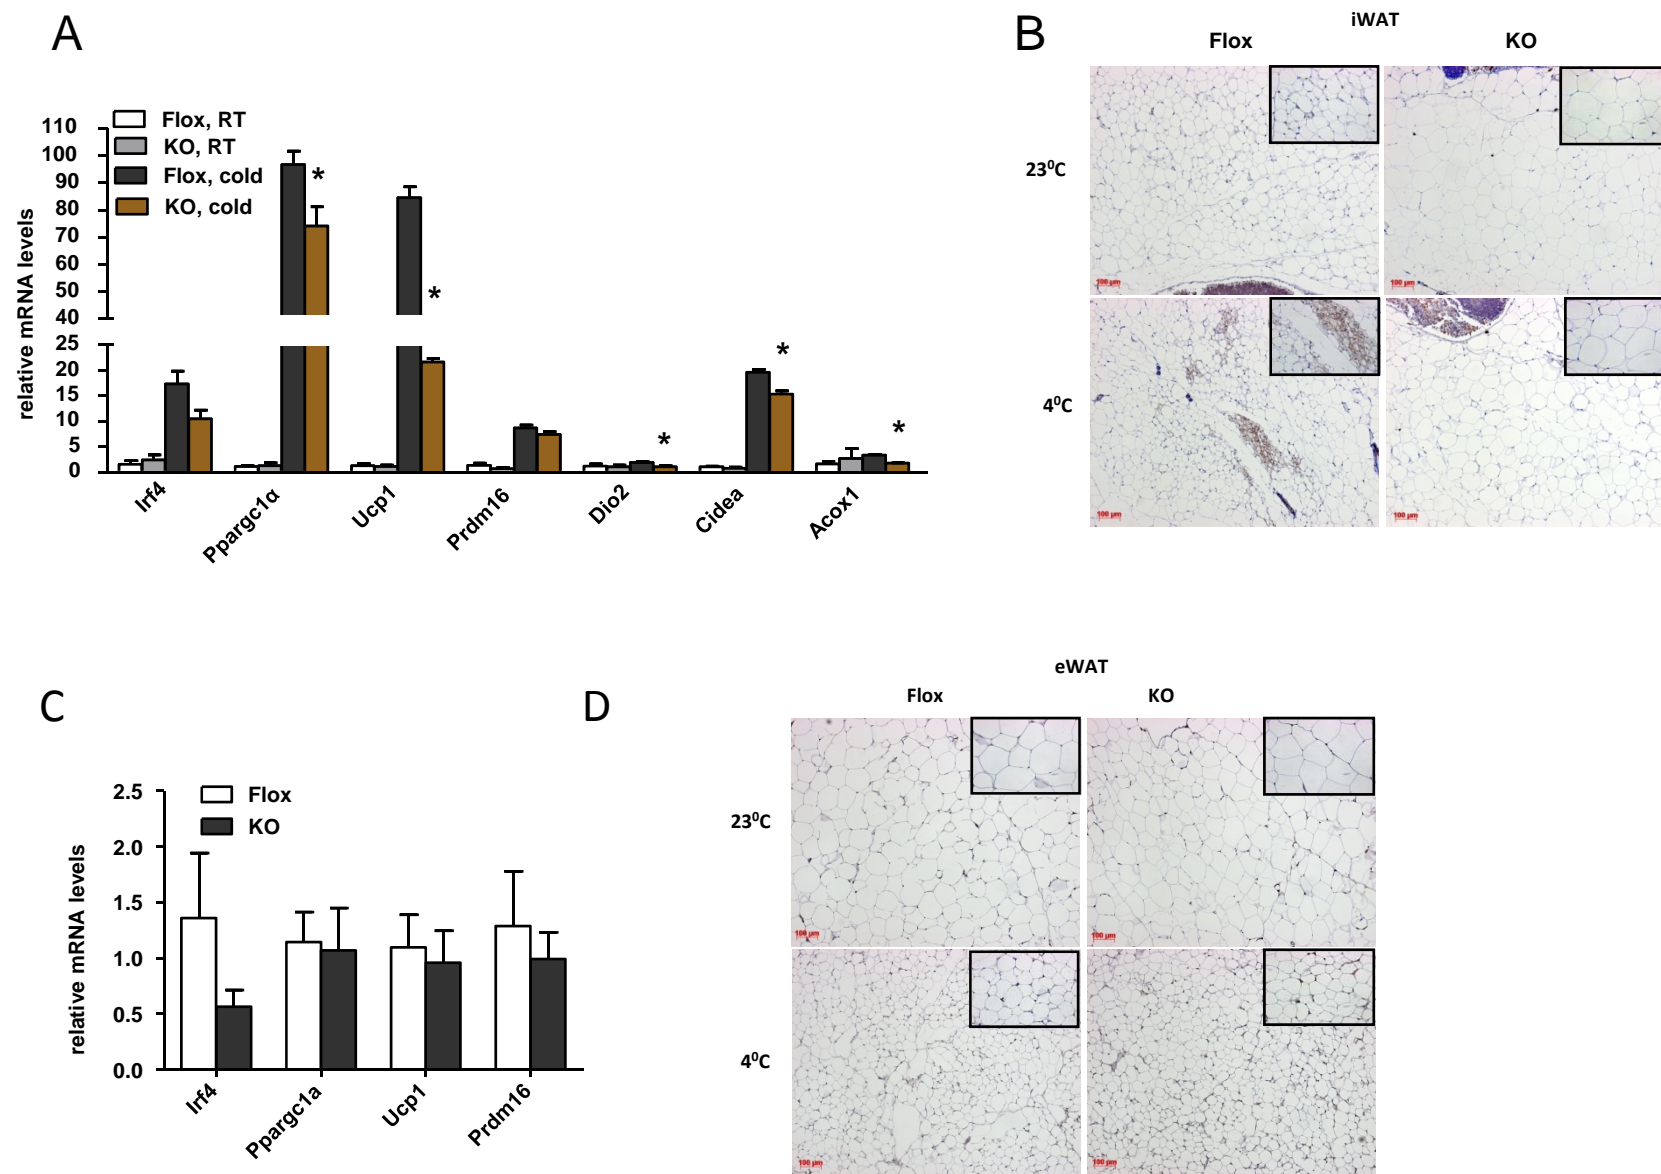

# Supplemental Figure 7

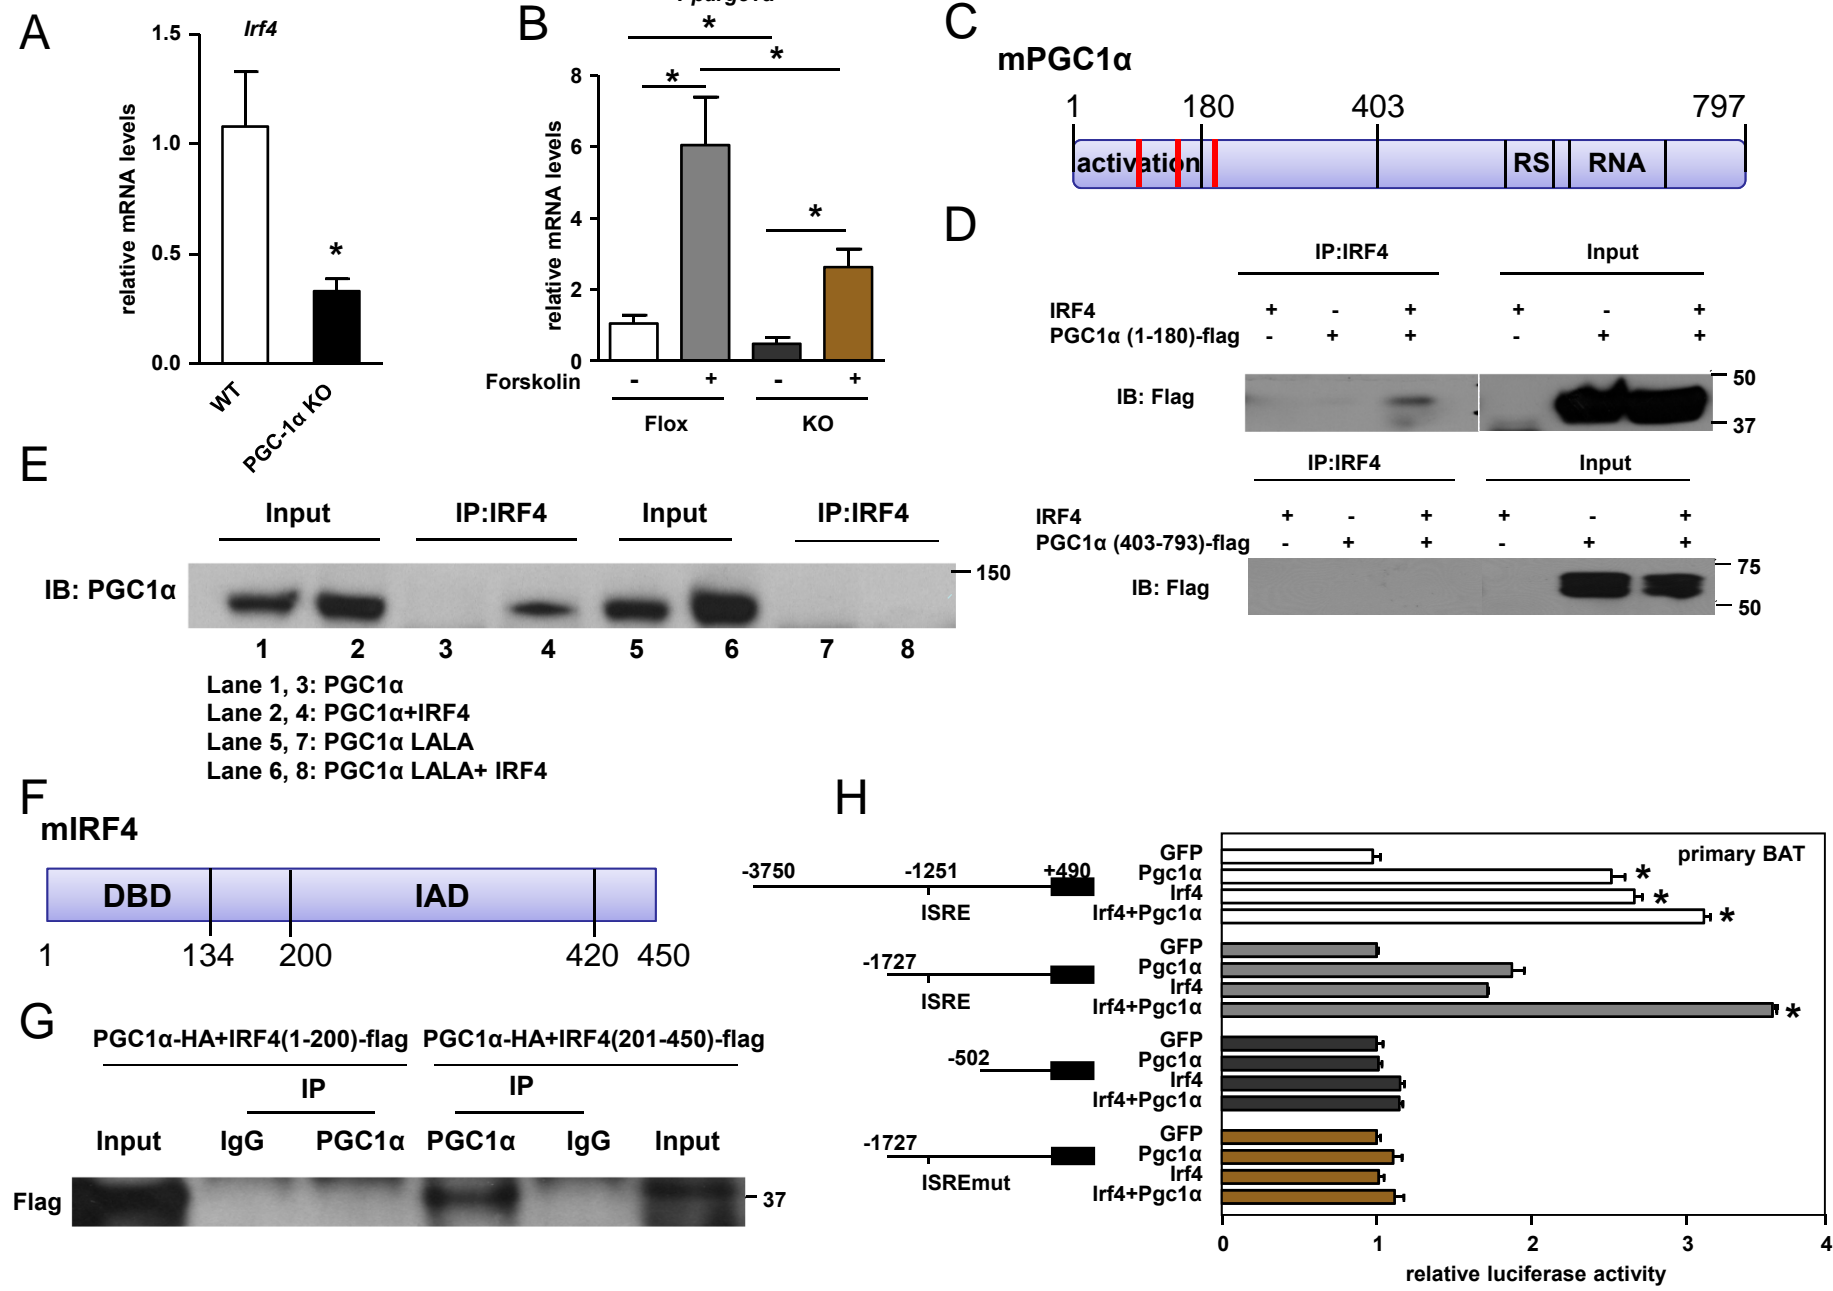

Supplement: NIHMS604255-supplement-02.pdf [file NIHMS604255-supplement-02.pdf]
